# Supplementary material
Source: PubMed Central journal article supplement (PMC4775977)
Supplement: AAC.02676-15_zac003164946so1.pdf [file AAC.02676-15_zac003164946so1.pdf]

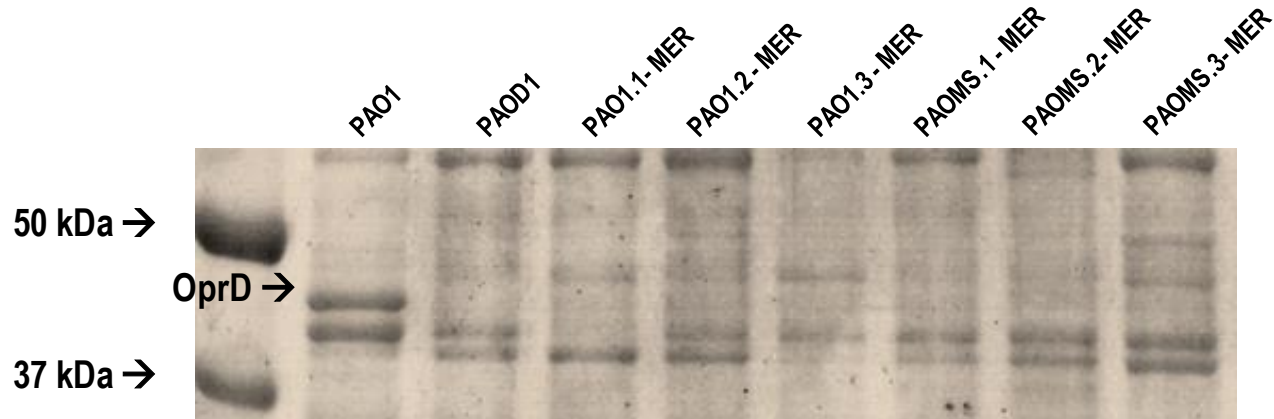

**Figure S1.** SDS-PAGE analysis of *P. aeruginosa* outer membrane proteins (OMPs) of PAO1 and PAOMS lineages evolved in the presence of meropenem. From left to right: Molecular Weight Marker, PAO1, PAO1 OprD mutant (PAOD1) and the 3 of PAO1 and PAOMS evolved lineages.

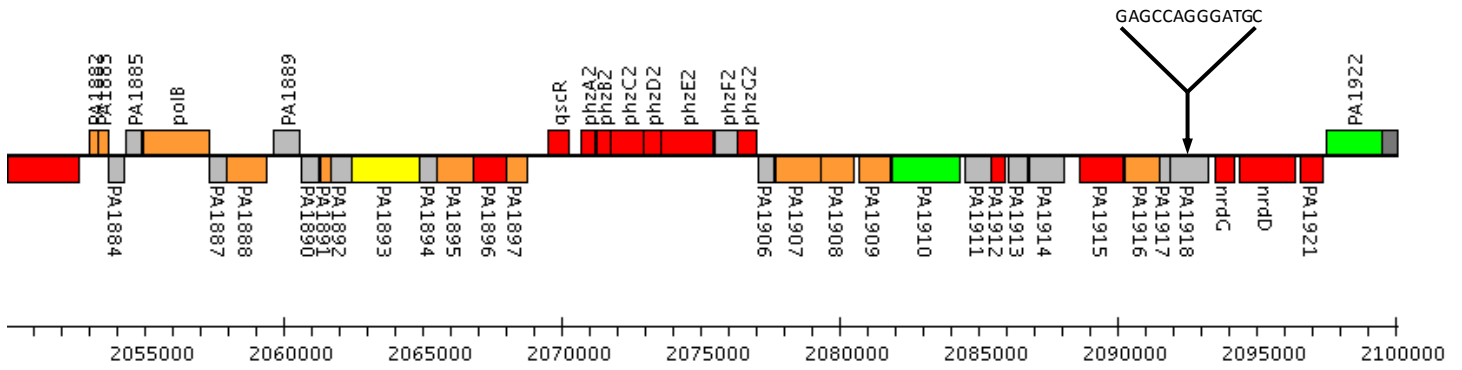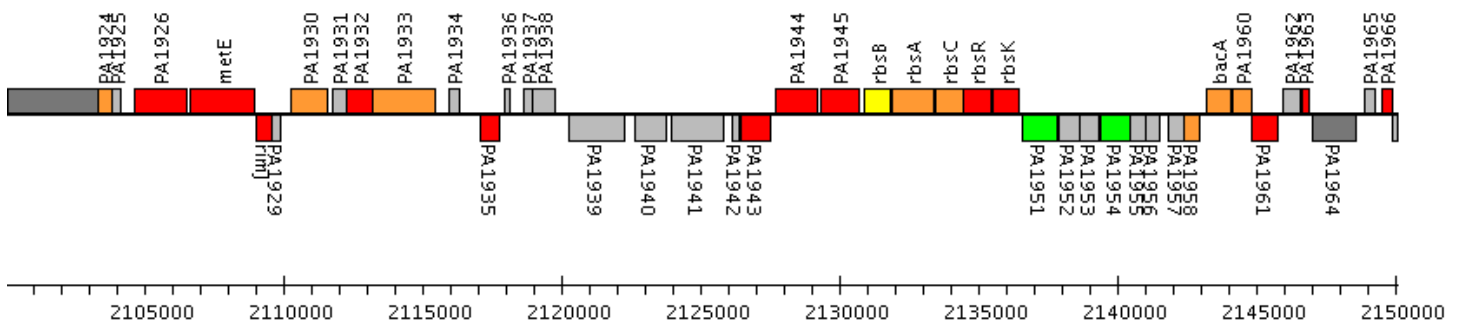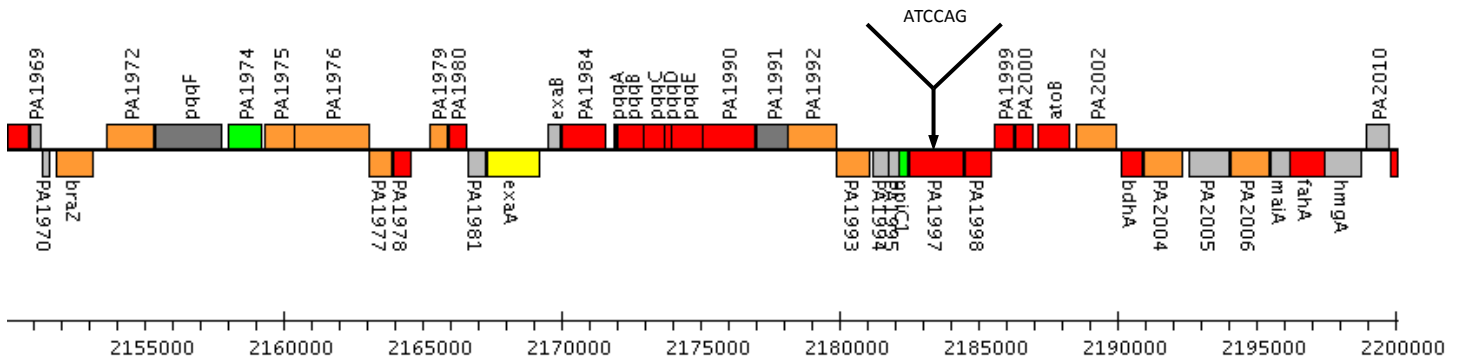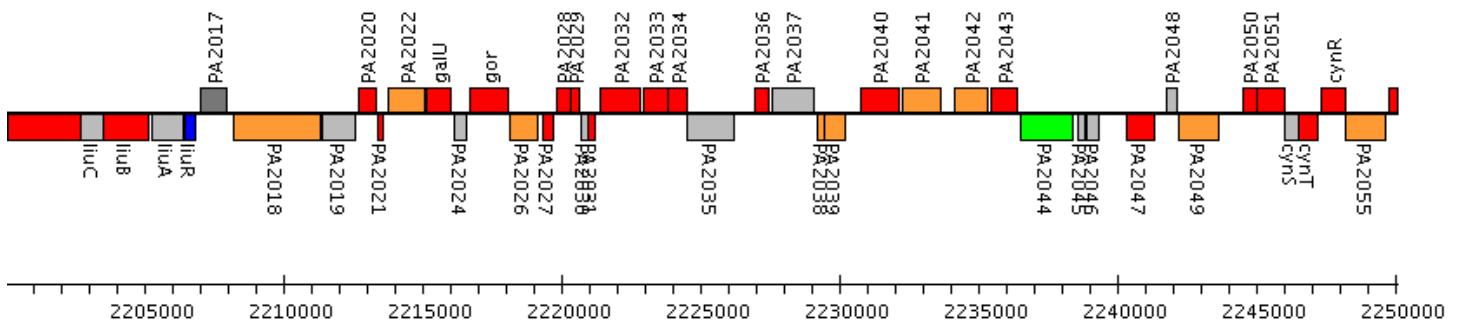

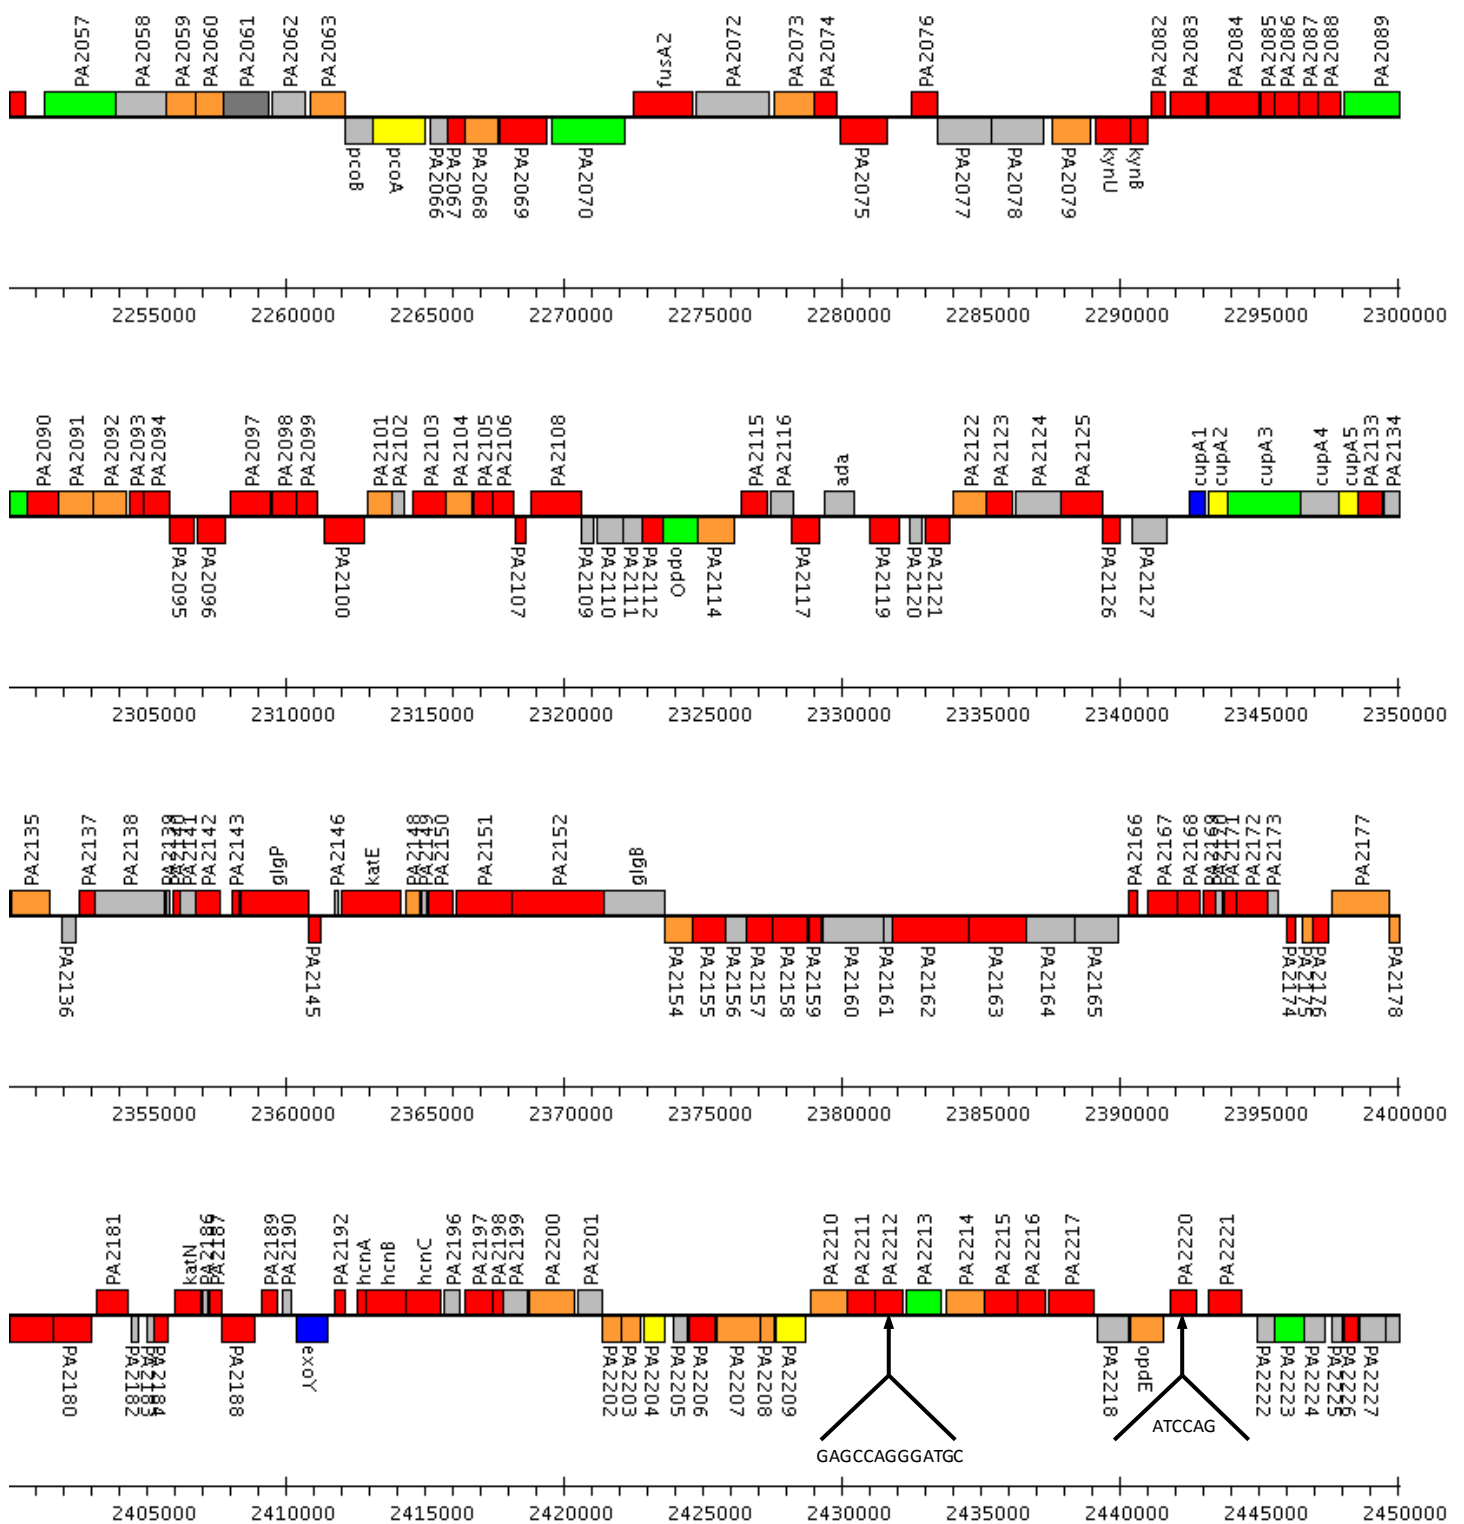

**Figure S2. Representation of the deleted regions in PAO1.1-MER and PAO1.3-MER.** Inverted repeats flanking the deleted regions in PAO1.1-MER (ATCCAG) and PAO1.3-MER (GAGCCAGGGATGC) are indicated. Template PAO1 genome was obtained from <http://www.pseudomonas.com>.

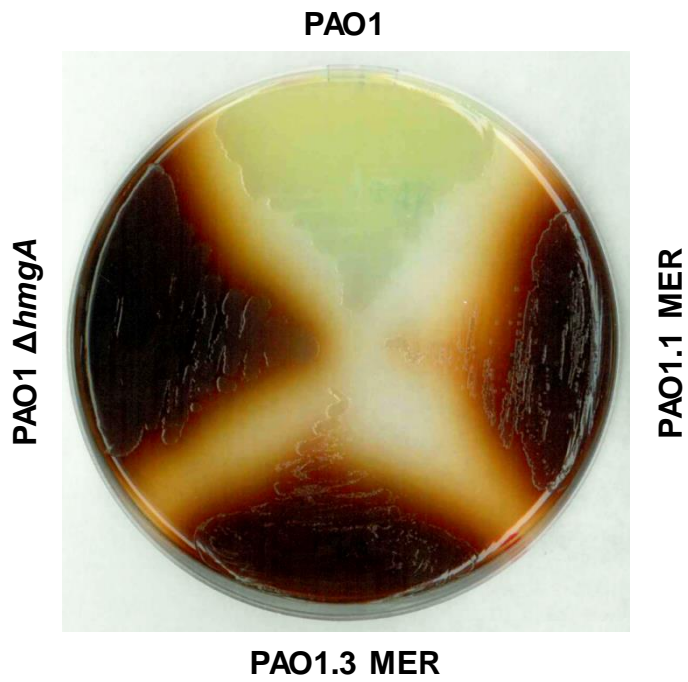

**Figure S3. Pyomelanin hyperproduction.** MH agar plate showing the pyomelanin hyperproduction phenotype of PAO1.1-MER and PAO1.3-MER. PAO1 is used as negative control and a  $\Delta hmgA$  PAO1 derivative as positive control.

**Table S1. Oligonucleotides used in this work.**

| Primer                 | Sequence (5' → 3')            | PCR product size (bp) | Use                                                                       | Source    |
|------------------------|-------------------------------|-----------------------|---------------------------------------------------------------------------|-----------|
| oprD-F                 | CGCCGACAAGAAGAACTAGC          | 1413                  | <i>oprD</i> amplification and sequencing                                  | [1]       |
| oprD-R                 | GTCGATTACAGGATCGACAG          |                       |                                                                           |           |
| PA1918-F               | ACAAGACTCATACGATCGTAC         | 1000                  | Characterization of MER mutants deletion                                  | This work |
| PA1918-Rint            | GCGGTAGTAGTCCACCATC           |                       |                                                                           |           |
| PA1997-F               | GGTTATGCTTCCTGCATGTC          | 1381                  | Characterization of MER mutants deletion                                  | This work |
| PA1997-Rint            | CCTTGCAATTGCAGTTCGCC          |                       |                                                                           |           |
| PA2212-F               | CGTACGCCGACCAGGAAC            | 772                   | Characterization of MER mutants deletion                                  | This work |
| PA2212-Rint            | GTTGTCGCCGTTGTGCGG            |                       |                                                                           |           |
| PA2220-F               | GATCAGCTCCGCTGGTGAC           | 836                   | Characterization of MER mutants deletion                                  | This work |
| PA2220-Rint            | ACACGGACGTTACGTTGTC           |                       |                                                                           |           |
| hmgA-F                 | GGGCTTGAGGATATCGG             | 1585                  | <i>hmgA</i> amplification and sequencing                                  | [2]       |
| hmgA-R                 | AGGCGACCCAGCTACGAGTG          |                       |                                                                           |           |
| ampD-F                 | GTACGCCTGCTGGACGATG           | 910                   | Amplification and sequencing of AmpC regulator <i>ampD</i>                | [3]       |
| ampD-R                 | GAGGGCAGATCCTCGACCAG          |                       |                                                                           |           |
| ampR-F                 | GTCGACCCAGTGCCTTCAGG          | 1400                  | Amplification and sequencing of AmpC regulator <i>ampR</i>                | [3]       |
| ampR-R                 | CTCGAGAGCGAGATCGTTGC          |                       |                                                                           |           |
| dacB-F                 | CGACCATTCCGGCGATATGAC         | 1721                  | Amplification and sequencing of AmpC regulator <i>dacB</i>                | [4]       |
| dacB-R                 | CGCGTAATCCGAAGATCCATC         |                       |                                                                           |           |
| nalB-F                 | CAGCGTGAAGGCGCTGCAC           | 790                   | Amplification and sequencing of <i>mexAB-oprM</i> regulator <i>mexR</i>   | [5]       |
| nalB-R                 | GAGCTGCTGCTCTCCGTCG           |                       |                                                                           |           |
| nalC-F                 | TCAACCCTAACGAGAAACGCT         | 1150                  | Amplification and sequencing of <i>mexAB-oprM</i> regulator <i>nalC</i>   | [6]       |
| nalC-R                 | TCCACCTCACCGAACTGC            |                       |                                                                           |           |
| nalD-F                 | GCGGCTAAAATCGGTACACT          | 1100                  | Amplification and sequencing of <i>mexAB-oprM</i> regulator <i>nalD</i>   | [7]       |
| nalD-R                 | ACGTCCAGGTGGATCTTGG           |                       |                                                                           |           |
| nfxB-F                 | GCCTCCTGTCGCTCTTCCG           | 957                   | Amplification and sequencing of <i>mexCD-oprJ</i> regulator <i>nfxB</i>   | [8]       |
| nfxB-R                 | CTGTGCGAGGCACTTTGTGCG         |                       |                                                                           |           |
| mexT-F                 | CTGTATCCGCCCATGCCTG           | 1126                  | Amplification and sequencing of <i>mexEF-oprN</i> regulator <i>mexT</i>   | This work |
| mexT-R                 | GACGCCTCGTGCGGGTAG            |                       |                                                                           |           |
| mexS-F                 | TGACAGGCATAGCCATTATC          | 1209                  | Amplification and sequencing of <i>mexEF-oprN</i> regulator <i>mexS</i>   | This work |
| mexS-R                 | GGTCAACGATCTGTGGATC           |                       |                                                                           |           |
| mvaT-F                 | CCACTCAGCACAGACAAGGT          | 440                   | Amplification and sequencing of <i>mexEF-oprN</i> regulator <i>mvaT</i>   | This work |
| mvaT-R                 | GCAGAGGAGCCGATACAATC          |                       |                                                                           |           |
| mexZ-F                 | ATTGGATGTGCATGGGTG            | 1000                  | Amplification and sequencing of <i>mexXY-oprM</i> regulator <i>mexZ</i>   | [9]       |
| mexZ-R                 | TGGAGATCGAAGGCAGC             |                       |                                                                           |           |
| PA5471-F               | GATCTACCGTTTCAATCACATGGAT     | 1600                  | Amplification and sequencing of <i>mexXY-oprM</i> regulator <i>PA5471</i> | [10]      |
| PA5471-R               | GGCCACCTCCTCGATTACCT          |                       |                                                                           |           |
| gyrA1                  | TTATGCCATGAGCGAGCTGGGCAACGACT | 364                   | <i>gyrA</i> amplification and sequencing                                  | [11]      |
| gyrA2                  | AACCGTTGACCAGCAGGTTGGGAATCTT  |                       |                                                                           |           |
| gyrB3                  | AGCTCGCAGACCAAGGACAAG         | 600                   | <i>gyrB</i> amplification and sequencing                                  | [11]      |
| gyrB4                  | GGGCTGGGCGATGTAGATGTA         |                       |                                                                           |           |
| parC1                  | ATGAGCGAACTGGGGCTGGAT         | 208                   | <i>parC</i> amplification and sequencing                                  | [11]      |
| parC2                  | ATGGCGGCGAAGGACTTGGGA         |                       |                                                                           |           |
| parE1                  | CGGCGTTCGTCTCGGGCGTGGTGAAGGA  | 592                   | <i>parE</i> amplification and sequencing                                  | [11]      |
| parE2                  | TCGAGGGCGTAGTAGATGTCCTTGCCGA  |                       |                                                                           |           |
| rpsL <sub>RNA</sub> -F | GCTGCAAACTGCCCGCAACG          | 250                   | Control house Keeping gene RT-PCR                                         | [11]      |
| rpsL <sub>RNA</sub> -R | ACCCGAGGTGTCCAGCGAACC         |                       |                                                                           |           |
| ampC <sub>RNA</sub> -F | GGGCTGGCCTCGAAAGAGGAC         | 246                   | <i>ampC</i> expression RT-PCR                                             | [12]      |
| ampC <sub>RNA</sub> -R | GCACCGAGTCGGGGAAGTCA          |                       |                                                                           |           |
| mexB <sub>RNA</sub> -F | CAAGGGCGTCCGTGACTTCCAG        | 273                   | <i>mexB</i> expression RT-PCR                                             | [11]      |
| mexB <sub>RNA</sub> -R | ACCTGGGAACCGTCGGGATTGA        |                       |                                                                           |           |

|                        |                         |     |                        |      |
|------------------------|-------------------------|-----|------------------------|------|
| mexD <sub>RNA</sub> -F | GGAGTTCGGCCAGGTAGTGCTG  | 236 | mexD expression RT-PCR | [11] |
| mexD <sub>RNA</sub> -R | ACTGCATGTCCCTCGGGGAAGAA |     |                        |      |
| mexF <sub>RNA</sub> -F | CGCCTGGTCACCGAGGAAGAGT  | 254 | mexF expression RT-PCR | [11] |
| mexF <sub>RNA</sub> -R | TAGTCCATGGCTTGGCGGAAGC  |     |                        |      |
| mexY <sub>RNA</sub> -F | TGGAAGTGCAGAACCGCCTG    | 270 | mexY expression RT-PCR | [11] |
| mexY <sub>RNA</sub> -R | AGGTCAGCTTGGCCGGGTC     |     |                        |      |

[1] Gutiérrez O, Juan C, Cercenado E, Navarro F, Bouza E, Coll P, et al. Molecular epidemiology and mechanisms of carbapenem resistance in *Pseudomonas aeruginosa* isolates from Spanish hospitals. *Antimicrob Agents Chemother.* 2007; 51(12):4329–35.

[2] Rodríguez-Rojas A, Mena A, Martín S, Borrell N, Oliver A, Blázquez J. Inactivation of the *hmgA* gene of *Pseudomonas aeruginosa* leads to pyomelanin hyperproduction, stress resistance and increased persistence in chronic lung infection. *Microbiology.* 2009; 155(4):1050-7.

[3] Juan C, Maciá MD, Gutiérrez O, Vidal C, Pérez JL, Oliver A. Molecular mechanisms of beta-lactam resistance mediated by AmpC hyperproduction in *Pseudomonas aeruginosa* clinical strains. *Antimicrob Agents Chemother.* 2005; 49(11):4733-8.

[4] Moya B, Dötsch A, Juan C, Blázquez J, Zamorano L, Haussler S, et al.  $\beta$ -Lactam resistance response triggered by inactivation of a nonessential penicillin-binding protein. *PLoS Pathog.* 2009; 5(3):e1000353.

[5] Cabot G, Ocampo-Sosa AA, Domínguez MA, Gago JF, Juan C, Tubau F, et al. Genetic Markers of Widespread Extensively Drug-Resistant *Pseudomonas aeruginosa* High-Risk Clones. *Antimicrob Agents Chemoter.* 2012; 56(12):6349-57.

[6] Llanes C, Hocquet D, Vogne C, Benali-Baitich D, Neuwirth C, Plésiat P. Clinical strains of *Pseudomonas aeruginosa* overproducing MexAB-OprM and MexXY efflux pumps simultaneously. *Antimicrob Agents Chemother.* 2004; 48(5):1797–802.

[7] Sobel ML, Hocquet D, Cao L, Plésiat P, Poole K. Mutations in PA3574 (*nalD*) lead to increased MexAB-OprM expression and multidrug resistance in laboratory and clinical isolates of *Pseudomonas aeruginosa*. *Antimicrob Agents Chemother.* 2005; 49(5):1782–6

[8] Mulet X, Macià MD, Mena A, Juan C, Pérez JL, Oliver A. Azithromycin in *Pseudomonas aeruginosa* Biofilms: Bactericidal Activity and Selection of *nfxB* Mutants. *Antimicrob Agents Chemoter.* 2009. 53(4):1552-60.

[9] Sobel ML, McKay GA, Poole K. Contribution of the MexXY multidrug transporter to aminoglycoside resistance in *Pseudomonas aeruginosa* clinical isolates. *Antimicrob Agents Chemoter.* 2003; 47(10):3202–7.

[10] Morita Y, Sobel ML, Poole K. Antibiotic Inducibility of the MexXY Multidrug Efflux System of *Pseudomonas aeruginosa*: Involvement of the Antibiotic-Inducible PA5471 Gene Product. *Journal of Bacteriology.* 2006; 188(5):1847-55.

[11] Oh H, Stenhoff S, Jalal S, Wretling B. Role of efflux pumps and mutations in genes for topoisomerases II and IV in fluoroquinolone-resistant *Pseudomonas aeruginosa* strains. *Microb Drug Resist.* 2003; 9(4):323–328.

[12] Juan C, Moya B, Perez JL, Oliver A. Stepwise upregulation of the *Pseudomonas aeruginosa* chromosomal cephalosporinase conferring high level beta-lactam resistance involves three AmpD homologues. *Antimicrob Agents Chemother.* 2006; 50(5):1780–7.
